# Supplementary material for: Association of fluid-attenuated inversion recovery vascular hyperintensity with ischaemic events in internal carotid artery or middle cerebral artery occlusion
Source: HighWire-hosted journal article supplement (doi:10.1136/svn-2022-001589), 2022-09-06
Supplement: svn-2022-001589supp001_data_supplement.pdf [file svn-2022-001589supp001_data_supplement.pdf]

## Supplementary Material

### Supplemental Methods

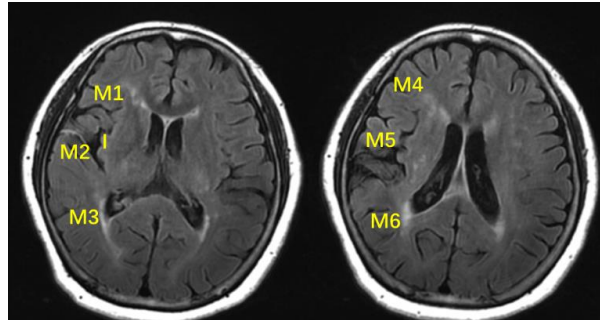

**Figure S1.** FVH-ASPECTS, a semi-quantitative scoring system for the evaluation of FLAIR vascular hyperintensity robustness in accordance with insular and M1-M6 regions in Alberta Stroke Program Early Computed Tomography Score (ASPECTS). I: insular region.

*Supplemental Results***Table S1.** Factors associated with symptomatic status in intracranial ICA or MCA occlusion

| Parameter                                                                   | Univariate          |         | Multivariate        |         |
|-----------------------------------------------------------------------------|---------------------|---------|---------------------|---------|
|                                                                             | OR (95% CI)         | P value | OR (95% CI)         | P value |
| <b>Model 1: Model recruiting FVH-ASPECTS and ASL-collateral circulation</b> |                     |         |                     |         |
| Age (per year)                                                              | 1.033 (1.002–1.065) | 0.038   | 0.999(0.957–1.042)  | 0.952   |
| Sex (male vs female)                                                        | 3.157 (1.033–9.650) | 0.044   | 1.493 (0.374–5.962) | 0.571   |
| Occlusive site (MCA vs ICA)                                                 | 1.886(0.886–4.012)  | 0.100   | 1.491 (0.546–4.069) | 0.436   |
| FVH-ASPECTS (per score)                                                     | 3.420 (2.179–5.368) | <0.0001 | 2.973 (1.849–4.781) | <0.0001 |
| ASL-collateral circulation (per grade)                                      | 0.441 (0.294–0.662) | 0.001   | 0.735 (0.453–1.193) | 0.213   |
| <b>Model 2: Model recruiting ASL-collateral circulation</b>                 |                     |         |                     |         |
| Age (per year)                                                              | 1.033 (1.002–1.065) | 0.038   | 1.017(0.979–1.055)  | 0.390   |
| Sex (male vs female)                                                        | 3.157 (1.033–9.650) | 0.044   | 2.482 (0.739–8.329) | 0.141   |
| Occlusive site (MCA vs ICA)                                                 | 1.886(0.886–4.012)  | 0.100   | 1.734 (0.715–4.208) | 0.224   |
| ASL-collateral circulation (per grade)                                      | 0.441 (0.294–0.662) | 0.001   | 0.474 (0.309–0.727) | 0.001   |
| <b>Model 3: Model recruiting FVH-ASPECTS</b>                                |                     |         |                     |         |
| Age (per year)                                                              | 1.033 (1.002–1.065) | 0.038   | 1.001(0.968–1.049)  | 0.725   |
| Sex (male vs female)                                                        | 3.157 (1.033–9.650) | 0.044   | 1.284 (0.333–4.956) | 0.717   |
| Occlusive site (MCA vs ICA)                                                 | 1.886(0.886–4.012)  | 0.100   | 1.635 (0.607–4.403) | 0.330   |
| FVH-ASPECTS (per score)                                                     | 3.420 (2.179–5.368) | <0.0001 | 3.232 (2.031–5.143) | <0.0001 |

OR, odds ratio; CI, confidence interval; MCA, middle cerebral artery; ICA, internal carotid artery; FVH, fluid-attenuated inversion recovery imaging vascular hyperintensity; ASL, arterial spin labeling

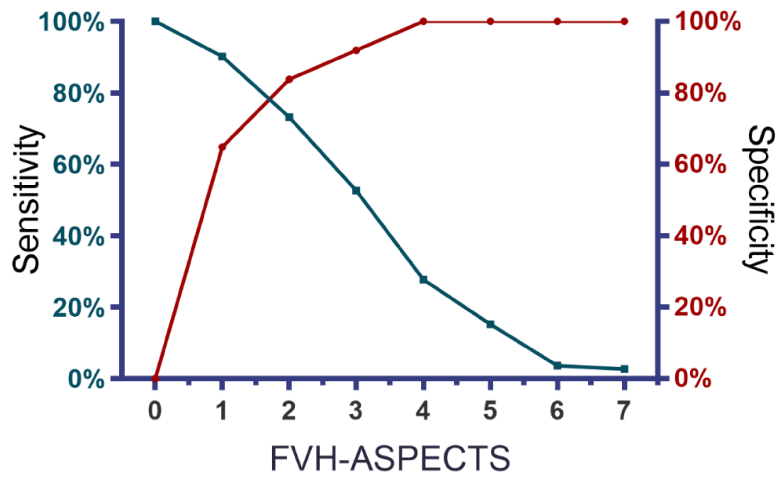

**Figure S2.** FVH-ASPECTS threshold effect on the sensitivity and specificity for identifying symptomatic status. It shows that the sensitivity decreases, and specificity increases along with the FVH-ASPECTS threshold increasing. FVH-ASPECTS: FLAIR vascular hyperintensity Alberta Stroke Program Early Computed Tomography Score.
